# Supplementary material for: Predicting Progression to Severe COVID-19 Using the PAINT Score Based on Natural Killer Cells
Source: Research Square preprint supplement (doi:10.21203/rs.3.rs-646188/v1), 2021-07-01
Supplement: Supplementary file 2 [file dd4a773059ff9d9c653510bf.docx]

| Variables | ROC comparison | |
| --- | --- | --- |
|  | C-Index | P value |
| PAINT score | 0.902 ± 0.021 |  |
| qSOFA score | 0.534 ± 0.027 | p<0.001 |
| CURB-65 score | 0.561 ± 0.058 | p<0.001 |
| Pulmonary disease | 0.543 ± 0.034 | p<0.001 |
| Age | 0.639 ± 0.052 | p<0.001 |
| IgM | 0.683 ± 0.044 | p<0.001 |
| CD16+/ CD56+ NK cell | 0.647 ± 0.050 | p<0.001 |
| AST | 0.716 ± 0.036 | p<0.001 |

**Table S2 The C-index for the prediction of progression for predicting progression from mild/moderate cases into severe cases.**

NOTE: Quick sequential organ failure assessment, qSOFA; aspartate aminotransferase, AST.
